# Supplementary material for: Molecular Genetic Mapping of Two Complementary Genes Underpinning Fruit Bitterness in the Bottle Gourd (Lagenaria siceraria [Mol.] Standl.)
Source: Front Plant Sci. 2019 Dec 18;10:1493. doi: 10.3389/fpls.2019.01493 (PMC6930244; doi:10.3389/fpls.2019.01493)
Supplement: SUPPLEMENTARY TABLE 1 — Genotype data and phenotype data for QTL mapping in the F2 population. [file Table_1.xls]

## Sheet: genotype
Marker	1	2	3	4	5	6	7	8	9	10	11	12	13	14	15	16	17	18	19	20	21	22	23	24	25	26	27	28	29	30	31	32	33	34	35	36	37	38	39	40	41	42	43	44	45	46	47	48	49
BGReSe_11480	B	A	A	H	X	A	A	A	A	H	A	H	X	H	A	H	B	A	B	B	H	H	A	H	B	H	A	A	A	A	H	H	H	H	B	A	H	B	A	A	H	A	H	H	H	A	H	H	B
BGReSe_11427	B	A	A	X	B	A	A	A	A	H	A	H	A	H	A	H	B	A	B	B	H	H	A	H	B	H	A	A	A	A	H	H	H	H	B	A	H	B	A	A	H	A	H	H	H	A	H	H	B
BGReSe_11498	B	A	A	H	B	A	A	A	H	H	A	H	A	H	A	H	B	A	B	B	H	H	A	H	B	H	A	A	A	A	H	H	H	H	B	A	H	B	A	A	H	A	H	H	H	A	H	H	B
BGReSe_11423	H	A	A	H	B	A	A	A	H	H	A	H	A	H	A	H	B	A	B	B	H	H	A	H	B	H	A	A	A	A	H	H	H	H	B	A	H	B	A	A	H	A	H	H	H	A	H	H	B
BGReSe_12958	B	H	H	H	B	A	A	A	H	H	A	H	A	H	A	H	B	A	B	H	H	H	A	B	B	H	A	A	A	A	H	B	H	H	B	A	H	B	A	A	B	A	H	A	H	A	H	H	B
BGReSe_12671	H	H	H	H	B	A	A	A	H	H	A	B	A	H	A	H	B	H	B	H	H	H	A	B	B	H	A	A	A	A	H	B	H	H	B	A	H	B	A	H	B	A	H	A	H	A	H	H	B
BGReSe_12558	H	H	H	H	B	A	A	A	H	B	A	B	A	H	A	H	B	H	B	H	H	H	A	B	B	H	A	A	A	A	H	B	H	H	B	A	H	B	A	H	B	A	H	A	H	A	H	H	B
BGReSe_12168	H	H	H	H	B	A	A	A	H	B	A	B	A	H	A	H	B	H	B	H	H	H	A	B	B	H	A	A	A	A	H	B	H	H	B	A	H	B	A	H	B	A	H	A	H	A	H	H	B
BGReSe_12281	H	H	H	H	B	A	A	A	H	B	A	B	A	H	A	H	B	H	B	H	H	H	A	B	B	H	A	A	A	A	H	B	H	H	B	A	H	B	A	H	B	A	H	A	H	A	H	H	B
BGReSe_11890	H	H	H	H	B	A	A	A	H	B	A	B	A	H	A	H	B	H	B	H	H	H	A	B	B	H	A	A	A	A	H	B	H	H	B	H	H	B	A	H	B	A	H	A	H	A	H	H	H
BGReSe_11611	X	H	H	H	B	A	A	A	H	B	A	H	A	H	A	H	B	H	B	H	H	H	A	B	B	H	A	A	A	A	H	B	H	H	B	H	H	B	A	H	B	A	H	A	H	A	H	H	H
BGReSe_12412	H	H	H	H	B	A	A	A	H	H	A	H	A	H	A	H	B	H	A	H	H	H	H	B	B	H	A	A	A	A	H	B	H	A	H	H	X	X	A	H	B	A	H	A	H	A	H	H	H
BGReSe_12971	H	H	H	H	B	A	H	A	H	H	A	X	A	H	A	H	B	H	A	H	H	H	H	B	B	H	A	A	A	A	H	B	B	A	H	H	H	B	A	H	B	A	H	A	H	H	H	H	X
BGReSe_13031	H	H	H	H	B	A	B	H	H	H	A	H	A	H	A	H	B	H	A	H	B	H	H	B	H	H	A	A	H	H	H	B	B	A	H	H	H	B	A	B	B	A	H	A	H	H	H	H	A
BGReSe_13083	A	H	B	H	B	A	B	B	H	H	A	H	H	H	A	H	B	H	A	H	B	H	H	H	A	H	H	A	A	A	H	B	B	A	B	H	H	B	A	B	B	A	H	A	A	A	B	B	H
BGReSe_13198	X	H	H	B	H	H	H	A	A	B	A	H	B	A	A	A	B	A	A	A	H	H	H	H	A	B	H	H	B	B	H	H	B	A	H	B	H	A	H	H	A	H	A	A	A	H	H	A	B
BGReSe_13211	H	H	B	B	H	H	H	A	A	B	H	H	B	A	H	A	B	A	A	A	H	B	A	H	A	B	H	H	B	B	H	A	H	A	H	B	H	H	H	H	A	A	A	A	A	H	H	A	B
BGReSe_13236	B	H	B	B	H	H	H	A	A	H	H	H	B	A	H	A	B	H	A	H	H	B	A	H	A	B	H	H	B	B	B	A	H	A	H	B	H	H	H	H	A	A	A	A	A	H	H	A	B
BGReSe_08535	H	H	H	B	H	H	A	A	B	B	H	H	H	A	B	A	B	H	H	H	A	H	H	H	H	H	H	H	H	H	A	H	A	H	H	H	H	B	A	H	A	H	H	B	A	H	A	A	H
BGReSe_08578	H	H	A	B	H	B	B	A	H	B	H	H	H	A	H	A	B	H	H	H	H	H	H	H	H	H	H	B	H	H	A	H	A	A	H	H	H	B	A	H	A	H	H	H	A	A	A	A	A
BGReSe_08705	B	A	A	B	B	H	A	A	A	B	H	H	A	B	A	H	H	H	B	B	B	A	H	H	A	H	H	H	A	A	B	B	A	A	H	H	H	B	A	B	H	H	H	H	H	H	A	A	A
BGReSe_08784	B	H	A	B	B	B	H	B	A	B	H	B	H	B	A	H	H	B	B	A	A	A	H	H	A	B	B	A	A	A	B	B	A	A	A	B	H	B	H	B	H	H	B	H	H	A	H	H	A
BGReSe_09031	H	A	H	A	A	A	H	A	B	A	H	B	A	H	H	H	A	H	A	H	B	B	H	H	H	H	X	H	H	H	B	H	H	H	H	B	A	H	H	H	A	H	A	A	A	H	B	B	H
BGReSe_09068	H	A	H	A	H	A	H	A	H	H	A	B	A	H	H	H	A	H	A	B	H	B	H	A	H	H	H	H	H	H	B	H	H	B	H	B	A	H	H	H	A	H	H	B	H	A	B	B	H
BGReSe_09205	H	A	H	H	H	H	H	A	A	B	A	B	B	H	B	A	B	H	A	B	H	H	H	A	A	H	H	H	H	H	H	H	H	B	H	B	A	H	H	H	A	A	B	B	H	H	H	B	H
BGReSe_09464	A	A	H	H	H	H	H	A	A	B	A	B	B	H	B	A	B	H	A	B	H	H	H	A	A	H	H	H	H	H	H	H	H	B	H	B	A	H	H	H	A	A	B	B	H	H	H	B	H
BGReSe_09112	A	A	H	H	H	H	H	A	A	B	A	X	B	H	B	A	B	H	A	B	H	H	H	A	A	H	H	H	H	H	H	H	H	B	H	B	A	H	H	H	A	A	B	B	H	H	H	B	H
BGReSe_09668	A	A	H	H	H	H	H	H	A	B	A	B	B	H	B	A	B	H	A	B	H	H	H	A	A	H	H	H	H	H	H	H	H	B	H	B	A	H	H	H	A	A	B	B	H	H	H	B	H
BGReSe_03635	A	A	H	H	H	B	H	H	A	B	H	B	B	H	B	A	B	H	A	H	H	H	H	A	A	H	H	H	H	H	H	H	H	B	B	B	A	H	H	H	A	A	B	B	H	X	H	B	B
BGReSe_10037	A	A	H	H	H	B	H	H	A	B	H	B	B	H	B	A	H	H	A	H	H	H	H	A	A	H	B	H	H	H	A	A	H	B	B	B	A	H	H	H	A	A	B	B	H	H	H	B	B
BGReSe_10133	H	A	A	H	B	B	H	H	A	B	H	H	B	H	H	H	H	H	A	A	H	H	H	H	A	H	B	H	H	H	A	A	H	H	B	H	A	H	H	H	H	H	B	H	H	H	H	A	H
BGReSe_10255	H	A	A	H	B	B	B	H	A	B	A	X	H	H	A	B	H	A	H	H	A	H	B	H	H	H	B	H	A	A	A	B	B	B	H	H	H	H	H	B	X	H	H	H	H	H	B	A	H
BGReSe_05455	A	H	A	A	A	B	B	A	H	A	B	A	A	B	H	B	H	H	H	H	X	A	H	B	H	A	B	H	A	A	A	H	B	A	B	B	B	B	A	A	A	H	H	A	H	B	A	H	H
BGReSe_05537	A	H	A	A	H	H	B	A	H	A	B	A	A	B	H	B	H	H	H	H	A	A	H	B	H	A	B	H	A	A	A	H	H	A	B	B	B	B	A	A	A	H	H	A	H	H	A	H	H
BGReSe_05560	A	H	A	A	H	H	B	A	H	A	B	A	A	B	H	B	B	H	H	H	A	A	H	B	H	A	B	H	A	A	A	H	H	A	B	B	B	B	A	A	A	H	H	A	H	A	A	H	H
BGReSe_05610	A	H	A	A	H	H	B	A	H	H	B	A	H	B	H	B	B	H	H	H	H	A	B	B	H	A	B	H	A	A	A	H	H	A	B	B	B	B	A	A	A	H	H	A	H	A	A	H	H
BGReSe_05646	A	H	A	A	H	H	B	H	B	H	H	A	A	H	A	B	H	H	H	H	H	H	B	B	H	A	H	H	A	A	H	H	H	A	B	B	B	B	A	A	A	H	H	A	H	A	H	H	H
BGReSe_07148	A	X	H	H	B	H	B	H	B	H	A	H	H	H	A	B	H	H	A	H	H	B	B	B	H	H	H	A	A	A	B	H	H	A	B	B	B	A	A	H	A	B	H	A	H	A	H	H	H
BGReSe_06917	A	H	H	H	B	H	B	H	B	B	A	H	H	H	A	B	H	H	A	H	B	B	B	B	H	H	A	A	B	B	B	H	H	A	B	B	B	A	A	H	A	B	H	H	H	A	H	H	H
BGReSe_06780	A	H	H	H	B	H	B	H	B	B	A	H	A	H	A	B	H	H	A	B	B	B	B	B	H	H	A	A	B	B	B	H	H	A	B	B	B	A	A	H	A	B	H	H	H	A	H	H	H
BGReSe_06431	A	H	H	H	B	H	B	H	B	B	A	B	A	H	A	B	H	H	A	B	B	B	B	B	H	H	A	A	B	B	B	H	A	A	B	B	B	A	A	H	A	B	H	H	H	A	H	H	H
BGReSe_06564	A	H	H	H	B	H	B	H	B	B	A	B	A	H	A	B	H	H	A	B	B	B	B	B	A	H	A	H	B	B	B	H	A	A	B	B	B	A	A	H	A	B	H	H	H	A	H	H	H
BGReSe_06224	A	H	H	H	B	B	B	H	B	B	A	B	A	H	A	B	H	H	A	B	B	B	B	B	A	H	A	H	B	B	B	H	A	A	B	B	B	A	A	H	A	B	H	H	H	A	H	H	H
BGReSe_06313	A	H	H	H	B	B	B	H	B	B	A	B	A	H	A	B	H	H	A	B	B	B	B	B	A	H	A	H	B	B	B	H	A	A	B	B	B	A	A	H	A	B	H	H	H	A	B	H	X
BGReSe_06036	A	B	H	H	B	B	B	H	B	B	A	B	A	H	A	B	H	H	A	B	B	B	B	B	A	H	H	H	B	B	B	H	A	A	B	B	B	A	A	H	A	B	H	H	H	A	B	H	H
BGReSe_05924	A	B	H	H	B	B	B	H	B	B	A	B	A	H	A	B	H	H	H	B	B	B	B	B	A	H	H	H	B	B	B	H	A	A	B	B	B	A	H	H	A	B	H	H	H	A	B	H	H
BGReSe_13827	A	H	H	B	H	H	H	B	H	H	A	B	B	H	H	H	H	H	H	B	H	A	A	H	H	H	A	H	B	B	H	A	H	A	H	B	B	H	H	B	B	B	H	H	H	A	B	A	A
BGReSe_14123	A	H	H	B	H	B	H	B	H	H	A	B	B	H	H	H	H	H	A	B	H	A	H	H	H	H	A	H	B	B	H	B	H	A	H	B	B	H	H	B	B	B	H	H	H	A	B	A	A
BGReSe_13708	A	H	H	B	H	B	H	B	H	B	A	B	B	A	H	H	B	A	A	B	H	A	H	B	H	H	A	H	B	B	H	B	H	A	H	B	B	H	H	B	A	B	H	H	H	A	B	A	A
BGReSe_13580	H	H	H	B	H	B	B	B	H	B	A	X	B	H	H	H	H	A	A	B	H	A	H	B	H	H	H	H	H	X	H	B	A	A	H	B	B	H	H	H	A	B	H	H	H	H	H	A	A
BGReSe_13550	H	H	H	B	H	B	B	B	H	B	A	B	X	H	H	H	A	A	A	B	H	A	H	B	H	H	H	H	H	H	H	B	A	A	H	B	B	H	H	H	A	B	H	H	A	H	H	H	H
BGReSe_13505	B	H	H	H	H	B	B	B	H	B	A	B	H	H	B	H	A	A	A	B	H	H	H	B	B	H	H	H	H	H	H	B	A	A	A	B	X	B	H	H	A	B	H	H	A	H	H	H	H
BGReSe_13413	B	H	H	H	H	B	B	B	B	B	A	B	A	H	B	H	A	A	A	B	H	H	H	B	B	A	H	H	H	H	H	B	A	A	A	B	H	B	H	H	A	B	A	H	A	H	H	H	H
BGReSe_13404	B	H	H	H	H	B	B	B	B	B	A	B	A	H	B	H	A	A	A	B	H	H	H	B	B	A	H	H	H	H	H	B	A	A	A	B	H	B	H	H	A	B	A	H	A	H	H	H	H
BGReSe_13336	B	H	H	H	H	B	B	B	H	B	A	B	A	H	B	H	A	A	A	H	H	H	H	B	B	A	B	H	H	H	H	B	A	A	H	B	H	B	H	H	A	B	A	H	A	H	H	H	H
BGReSe_13268	B	H	H	H	H	H	X	B	H	B	A	B	A	X	B	H	A	A	A	H	H	H	H	B	X	A	B	H	H	H	H	B	A	A	H	B	A	B	H	H	A	B	A	H	A	H	B	H	H
BGReSe_04260	H	H	H	A	A	H	B	H	A	A	A	B	B	B	A	B	A	H	A	H	H	B	H	A	H	H	H	H	B	B	B	H	H	H	H	B	H	A	B	A	B	B	H	H	H	H	B	B	H
BGReSe_04316	H	H	H	A	A	H	B	H	A	H	A	H	X	B	A	B	H	A	A	H	H	B	H	A	H	H	H	H	B	B	B	H	A	H	H	H	H	A	B	H	B	B	H	H	H	A	H	H	H
BGReSe_04393	H	X	H	A	A	H	B	H	A	H	A	H	B	B	A	B	H	A	A	H	H	B	H	A	H	H	X	H	H	H	B	H	A	H	H	H	H	A	B	H	B	B	H	H	H	A	H	H	H
BGReSe_04783	H	H	H	A	A	H	H	H	A	H	X	H	B	B	A	B	H	A	A	H	H	B	H	A	A	H	H	H	H	H	B	H	A	A	A	H	B	A	B	H	B	B	H	H	H	A	A	H	H
BGReSe_04912	H	H	H	A	A	H	H	H	A	H	A	H	B	B	A	B	H	A	A	H	H	B	H	A	A	A	H	H	H	H	B	H	A	A	A	H	B	A	B	H	B	B	H	H	H	A	A	H	H
BGReSe_04979	H	H	H	A	A	H	H	H	A	H	A	H	X	B	A	B	H	A	A	H	A	B	H	A	A	A	H	B	H	H	B	H	A	A	A	H	X	A	B	H	B	B	H	H	H	A	A	H	H
BGReSe_05066	H	H	H	A	A	H	H	H	A	H	A	H	B	B	A	B	H	X	H	H	A	B	H	A	A	A	H	B	H	H	B	H	A	A	A	H	B	A	B	H	B	B	H	H	H	A	A	H	H
BGReSe_05210	H	H	H	A	A	H	H	H	A	H	A	A	X	H	A	H	H	A	H	H	A	B	H	H	A	A	H	B	H	H	B	H	A	A	A	H	X	A	B	H	B	B	H	H	A	A	A	H	H
BGReSe_05383	H	H	H	A	A	H	H	H	A	H	A	A	B	H	A	H	H	A	H	H	A	B	H	H	A	A	H	B	H	H	H	H	A	A	A	H	B	A	H	H	B	B	H	H	A	A	A	H	B
BGReSe_05289	H	H	H	A	A	H	H	H	A	H	A	A	B	H	A	H	H	A	H	H	A	B	H	H	A	A	H	B	H	H	H	H	A	A	A	H	B	A	H	H	B	B	H	H	A	A	A	H	B
BGReSe_07385	B	H	B	A	H	H	B	A	H	H	A	A	H	H	H	B	H	H	H	H	H	B	A	B	A	A	B	A	A	A	H	H	H	A	H	H	B	B	B	H	A	H	H	A	B	B	B	B	A
BGReSe_07403	B	H	B	H	H	H	B	A	H	H	A	A	H	H	H	H	H	H	H	H	H	B	A	B	A	A	B	A	A	A	A	H	X	B	H	H	B	B	B	H	H	H	H	A	B	B	B	B	A
BGReSe_07458	H	A	B	A	H	H	B	A	H	H	H	A	B	A	H	H	H	H	A	H	H	B	A	B	H	A	B	A	B	B	A	H	H	B	H	H	B	B	H	H	H	B	H	A	H	H	B	B	H
BGReSe_07608	H	A	B	H	B	H	H	A	A	B	H	H	B	A	H	H	A	B	A	H	A	H	B	B	H	A	H	A	B	B	A	A	B	H	H	A	H	H	H	H	A	H	H	A	H	B	A	B	H
BGReSe_07504	H	A	B	H	B	H	H	A	A	B	H	H	B	A	H	H	H	B	A	H	A	H	B	B	H	A	H	A	B	B	A	A	B	H	H	A	H	H	H	H	A	H	H	A	H	B	A	B	H
BGReSe_07695	H	A	B	H	B	H	H	A	A	B	H	H	B	A	H	H	H	B	A	H	A	H	B	B	H	A	H	A	B	B	A	A	B	H	H	A	H	H	H	H	A	H	H	H	H	B	A	B	H
BGReSe_07846	H	A	B	H	B	H	H	A	A	B	H	H	B	A	H	H	H	B	A	H	X	H	B	B	H	A	H	A	B	B	A	A	B	H	H	A	H	H	H	H	A	H	H	H	H	B	A	B	H
BGReSe_07903	H	H	B	H	B	H	H	A	A	B	H	H	B	A	H	H	H	B	A	H	A	H	B	B	H	A	H	A	B	B	A	H	B	H	H	A	H	H	H	H	A	H	H	H	H	B	A	B	H
BGReSe_08039	H	H	B	H	B	H	H	A	H	B	H	H	B	A	H	H	H	B	A	H	A	H	B	B	H	A	H	A	B	B	A	H	B	H	H	A	H	H	H	H	A	H	H	H	H	B	A	B	H
BGReSe_08366	H	H	B	H	B	H	H	A	H	B	H	H	B	A	H	A	H	B	A	H	A	H	B	B	H	A	B	A	B	B	A	H	B	A	H	A	H	H	H	H	A	H	H	H	H	B	A	B	H
BGReSe_03745	H	H	A	H	B	B	H	A	H	A	H	H	B	A	A	A	H	H	H	A	H	B	H	H	H	H	B	H	A	A	H	B	B	H	X	H	H	A	H	A	B	B	A	B	H	A	H	H	A
BGReSe_01654	H	A	B	B	H	B	B	B	B	H	H	B	B	H	A	B	H	H	B	H	H	A	H	H	B	B	A	A	A	A	H	A	A	A	H	B	H	H	A	A	A	B	A	A	A	A	H	H	H
BGReSe_01627	B	A	B	H	H	B	H	H	B	H	H	B	B	B	A	B	H	H	B	H	H	A	H	H	B	B	A	H	A	A	A	H	A	A	H	B	H	H	A	A	H	B	A	H	A	A	H	B	H
BGReSe_01129	B	A	H	H	H	B	A	H	H	H	H	H	B	B	A	H	H	H	B	H	B	A	H	H	H	B	B	H	A	A	A	H	H	A	H	H	H	H	H	A	X	H	A	H	H	A	A	H	B
BGReSe_01539	B	A	H	H	H	B	A	H	H	H	H	H	B	B	A	H	H	H	B	A	B	H	H	H	H	B	B	H	A	A	A	H	H	A	H	H	H	H	H	A	B	H	A	H	H	A	A	H	B
BGReSe_00676	B	A	H	H	H	B	A	H	H	A	H	H	B	B	A	H	H	H	B	A	B	H	H	H	H	B	B	H	A	A	A	H	H	A	H	H	H	H	H	A	B	H	A	H	H	A	A	H	B
BGReSe_00780	B	A	H	H	H	B	A	H	H	A	H	H	B	B	A	H	H	H	B	A	B	H	H	H	H	B	B	H	A	A	A	H	H	A	H	H	H	H	H	A	B	H	A	H	H	A	A	H	B
BGReSe_00787	B	A	H	H	H	B	A	H	H	A	H	H	B	B	A	H	H	H	B	A	B	H	H	H	H	B	B	H	A	A	A	H	H	A	H	H	H	H	H	A	B	H	A	H	H	A	A	H	B
BGReSe_00244	X	A	H	H	H	X	A	H	H	A	H	H	B	B	A	H	H	H	B	H	B	H	H	H	H	B	B	H	A	A	A	H	H	A	H	H	H	H	H	A	B	H	A	H	H	A	A	H	B
BGReSe_00214	B	A	X	H	H	B	A	H	H	A	H	H	B	B	H	H	H	H	B	H	B	H	H	H	H	B	X	H	A	A	A	H	H	A	H	H	H	H	H	A	B	H	A	H	H	A	A	H	B
BGReSe_00953	B	A	H	H	H	B	H	H	H	A	H	H	B	B	H	H	H	H	B	H	B	H	H	H	A	B	B	H	A	A	A	H	H	A	H	H	H	H	H	A	B	H	A	H	H	A	A	H	B
BGReSe_00321	B	A	H	H	H	B	H	H	A	A	H	H	B	B	H	H	H	H	B	H	H	H	H	H	A	B	B	H	A	A	A	H	B	A	H	H	A	H	H	A	B	H	A	H	H	A	A	H	B
BGReSe_00164	B	A	H	B	H	B	H	B	A	A	H	A	B	B	H	H	H	H	B	H	A	A	H	H	A	B	X	H	A	A	A	A	B	A	B	H	A	B	H	H	B	H	H	H	H	H	A	H	B
BGReSe_00068	A	B	H	H	A	H	H	H	A	A	H	A	B	B	H	B	A	H	B	A	H	A	H	H	A	H	H	B	B	B	H	A	B	A	H	H	A	B	H	B	B	B	B	H	H	H	H	B	B
BGReSe_00012	A	B	H	H	H	H	H	H	A	A	H	A	B	H	H	B	H	H	B	A	H	A	H	H	A	H	H	B	B	B	H	A	H	A	H	A	A	B	H	B	B	B	B	H	H	H	H	B	B
BGReSe_03572	A	B	A	B	A	B	A	A	A	A	A	H	A	A	A	A	A	A	B	B	A	A	A	A	B	A	A	B	A	A	B	B	B	A	A	A	A	A	A	A	B	B	A	A	A	A	A	B	A
BGReSe_03370	H	B	H	H	A	X	H	H	H	B	A	B	A	A	H	H	A	H	B	H	H	H	H	H	A	H	A	B	H	H	B	B	X	A	A	H	A	H	H	H	B	B	A	A	H	H	B	H	H
BGReSe_03229	H	B	H	H	A	B	H	H	H	B	H	B	A	A	A	H	A	B	B	H	H	H	H	H	A	H	A	B	H	H	B	B	B	A	A	H	A	H	H	H	B	B	A	A	H	H	B	H	H
BGReSe_02908	H	B	H	H	A	B	H	H	H	B	H	B	A	A	A	H	H	B	B	H	H	H	H	H	A	H	A	B	H	H	B	B	B	A	A	H	A	H	H	H	B	B	A	A	H	H	B	H	H
BGReSe_02815	H	B	H	H	A	B	H	H	H	B	H	B	A	A	A	H	H	B	B	H	H	H	H	H	A	H	H	B	H	H	B	B	B	A	A	H	A	H	H	H	B	B	A	A	H	H	B	H	H
BGReSe_02760	H	B	H	H	A	B	H	H	H	B	H	X	A	A	A	H	H	B	B	H	H	H	H	H	A	H	H	B	H	H	B	B	B	A	A	H	A	H	H	H	B	B	A	A	H	H	B	H	H
BGReSe_02460	H	B	H	H	A	B	H	H	H	B	H	X	A	A	A	H	H	B	B	H	H	H	H	H	A	H	H	B	H	H	B	B	B	A	A	H	A	H	H	H	B	B	A	A	H	H	B	H	H
BGReSe_02509	H	X	H	H	A	B	H	H	H	B	H	B	A	A	A	H	H	B	B	H	H	H	H	H	A	H	H	B	H	H	B	B	B	A	A	H	A	H	H	H	B	B	A	A	H	H	B	H	H
BGReSe_02652	H	B	H	H	A	B	H	H	A	B	H	B	A	A	A	H	H	B	B	H	H	H	H	H	A	H	H	B	H	H	B	B	B	A	A	H	A	H	H	H	B	B	A	A	H	H	B	H	H
BGReSe_02267	H	B	H	H	A	B	H	H	A	B	H	B	A	A	A	H	H	B	B	H	H	H	H	H	A	H	H	B	H	H	B	B	B	A	A	H	A	H	H	H	B	B	A	A	H	H	B	H	H
BGReSe_02284	H	B	H	H	A	B	H	H	A	B	H	B	A	A	A	H	H	B	B	H	H	H	H	H	A	H	H	B	H	H	B	X	B	A	A	H	A	H	H	H	B	B	A	A	H	H	B	H	H
BGReSe_02158	H	H	H	H	A	B	H	H	A	B	H	B	H	A	A	H	H	B	B	H	H	H	B	H	A	H	H	B	H	H	B	B	B	A	A	H	H	H	H	H	B	B	A	H	H	H	B	H	H
BGReSe_01896	H	H	A	A	H	H	H	H	A	H	H	X	H	A	H	H	H	B	B	B	H	H	B	H	H	B	H	H	B	B	B	B	B	H	H	H	H	H	H	H	B	H	H	H	B	A	B	H	H
BGReSe_01846	H	H	A	A	H	H	H	B	A	H	A	B	H	A	H	A	H	B	H	B	H	H	B	B	H	B	H	H	B	B	X	B	B	H	H	H	H	H	H	H	H	B	H	H	B	A	H	A	H
BGReSe_01737	B	A	H	H	H	A	H	H	B	A	H	B	A	H	B	H	H	B	H	B	H	H	H	H	A	H	H	H	H	H	A	H	H	H	H	H	H	A	H	A	H	B	H	A	A	H	B	A	A
BGReSe_01731	B	A	H	H	H	A	H	H	B	A	H	B	A	H	B	H	H	B	H	B	H	H	H	H	A	H	H	H	H	H	A	H	H	H	H	H	H	A	H	A	H	B	H	A	A	H	B	A	A
BGReSe_11415	B	H	H	H	H	B	H	A	B	A	A	B	A	H	H	H	B	H	B	A	A	A	H	H	A	B	A	H	A	A	H	H	H	B	H	H	A	B	H	A	A	B	A	H	A	B	H	B	B
BGReSe_11384	B	H	H	H	H	B	H	A	B	A	A	B	A	H	H	H	B	H	B	A	A	A	H	H	A	B	A	H	A	A	H	H	B	B	H	H	A	B	H	A	A	H	A	H	A	B	H	B	B
BGReSe_11318	B	H	H	B	B	B	H	A	H	A	A	B	A	H	H	H	H	H	B	A	A	A	H	H	A	H	A	H	H	H	A	B	B	H	B	H	H	H	A	H	A	H	A	H	A	B	H	B	H
BGReSe_11274	B	H	H	H	B	B	H	A	H	A	A	B	H	H	H	H	H	H	H	H	B	A	H	H	A	H	A	H	B	B	A	B	B	H	B	H	H	H	A	A	A	H	A	A	A	H	H	B	H
BGReSe_11107	H	H	H	H	H	B	X	H	B	A	H	H	H	H	H	H	B	H	H	H	B	A	H	H	B	H	A	H	B	B	H	H	B	A	B	A	H	H	A	A	H	H	A	H	A	H	H	B	H
BGReSe_11032	H	H	H	H	H	H	H	H	B	A	H	H	H	H	B	H	H	H	H	H	B	A	B	H	B	A	H	H	B	B	H	H	B	A	H	A	H	H	A	A	B	H	A	H	A	H	X	B	H
BGReSe_10979	H	B	H	H	H	H	H	H	X	A	H	H	H	H	B	H	H	H	H	H	B	A	B	H	B	A	H	H	B	B	H	H	B	A	H	A	H	H	A	A	B	H	A	H	A	H	A	B	H
BGReSe_10672	H	B	H	H	H	H	H	H	B	A	H	H	H	H	B	H	H	H	H	H	B	A	B	H	B	A	H	H	B	B	H	H	B	A	H	A	H	H	A	A	B	H	A	H	A	H	A	B	H
BGReSe_10640	H	B	H	H	H	H	H	H	B	A	H	H	H	H	B	H	H	H	H	H	B	A	B	H	B	A	H	H	B	B	H	H	B	A	H	A	H	H	A	A	B	H	A	H	A	H	A	B	H
BGReSe_10504	H	B	A	H	H	H	H	H	B	A	H	H	H	H	B	H	H	H	H	H	B	A	B	H	B	A	H	H	B	B	H	H	B	A	H	A	H	H	A	A	B	H	A	H	A	H	A	B	H
BGReSe_10556	X	B	A	H	H	H	H	H	B	A	H	H	H	H	B	H	H	H	H	H	B	A	B	H	B	A	H	H	B	B	H	H	B	A	H	A	H	H	A	A	B	H	A	H	A	H	A	B	H
BGReSe_10475	H	B	A	H	H	H	H	H	B	A	H	H	H	H	B	H	H	H	H	H	B	A	B	H	B	A	H	H	B	B	H	H	B	A	H	A	H	H	A	A	B	H	A	H	A	H	A	B	H
BGReSe_18301	H	B	A	H	H	H	H	H	B	A	H	H	H	H	B	H	H	H	H	H	B	A	B	A	B	A	H	H	B	B	H	H	B	A	H	A	H	H	A	A	B	H	A	H	A	H	A	B	H
BGReSe_10397	H	B	A	H	H	H	H	H	B	A	X	H	H	H	B	H	B	H	H	H	B	A	B	A	B	A	H	H	B	B	H	H	B	A	H	A	H	H	A	A	B	H	H	H	A	H	A	B	H
BGReSe_10361	H	B	A	H	H	H	H	H	B	A	H	H	H	H	B	H	B	H	H	H	B	A	B	A	B	A	H	H	B	B	H	H	B	A	H	A	H	H	A	A	B	H	H	H	A	H	A	B	H
BGReSe_10326	H	B	A	H	H	H	H	H	B	A	H	H	H	H	B	H	B	H	H	H	B	A	B	A	B	A	H	H	H	H	H	H	B	A	H	A	H	H	A	A	B	H	H	H	A	H	H	B	H
BGReSe_16360	B	H	B	B	B	A	H	A	H	H	H	H	H	H	B	H	H	H	H	B	H	H	H	A	H	H	H	A	H	H	H	B	A	H	B	B	A	A	X	H	B	B	B	B	A	H	H	B	B
BGReSe_16400	B	H	B	B	B	H	H	A	H	H	H	H	H	A	B	H	H	H	H	B	H	H	H	A	H	H	H	A	H	H	H	B	A	H	B	B	A	A	H	H	B	B	B	B	A	H	H	B	B
BGReSe_16298	B	H	B	B	B	H	H	A	H	H	H	H	H	A	B	H	H	H	H	B	H	H	B	A	H	B	H	A	H	H	H	B	A	H	B	B	A	A	H	B	B	B	B	B	A	B	H	B	B
BGReSe_16261	B	H	A	B	B	H	H	A	H	B	B	H	H	A	B	H	A	H	B	B	H	H	B	A	H	B	H	A	H	H	H	B	A	B	B	B	A	H	H	B	B	B	B	B	A	B	B	B	B
BGReSe_16204	H	H	A	B	A	B	B	A	H	B	B	H	H	A	H	H	A	A	H	H	H	H	B	A	H	B	B	A	H	H	H	B	A	B	H	B	H	H	H	B	B	H	B	B	A	B	B	H	B
BGReSe_11717	H	H	A	H	A	B	B	A	H	B	B	H	H	A	H	H	A	A	H	H	H	H	B	A	H	B	B	A	H	H	H	B	A	B	H	B	H	H	H	B	B	H	B	H	H	B	B	H	B
BGReSe_16795	H	H	A	H	X	B	B	A	H	B	B	X	H	A	H	H	A	A	H	H	H	H	B	A	H	B	B	A	H	H	H	B	A	B	H	B	H	H	H	B	B	H	B	H	H	B	B	H	B
BGReSe_16776	H	H	A	H	A	B	B	A	H	B	B	H	H	A	H	H	A	A	H	H	H	H	B	A	H	B	B	A	H	H	H	B	A	B	H	B	H	H	H	B	B	H	B	H	H	B	B	H	B
BGReSe_16077	H	H	A	H	A	B	B	A	H	B	B	H	H	A	H	H	H	A	H	H	H	H	B	A	H	B	B	A	H	H	H	H	A	B	H	B	H	H	H	B	B	H	H	H	H	B	B	H	B
BGReSe_16005	H	H	A	H	A	H	B	A	H	H	B	H	H	H	H	H	H	A	H	H	H	H	H	H	H	B	B	A	H	H	B	H	A	B	H	B	H	H	H	B	B	H	H	A	H	B	B	A	B
BGReSe_15978	H	H	A	H	A	H	B	A	H	H	B	H	A	H	H	H	A	A	H	H	H	H	H	H	A	B	B	A	H	H	B	H	A	B	H	B	H	H	H	B	B	H	H	A	H	B	B	A	H
BGReSe_15931	H	H	H	H	A	H	B	A	H	H	B	H	H	H	H	A	H	A	H	H	H	A	H	H	A	B	B	A	H	H	B	H	A	B	H	B	H	H	H	B	X	H	H	A	H	B	B	A	H
BGReSe_15900	X	H	H	H	A	H	B	A	H	H	H	H	H	H	H	A	H	H	H	H	B	A	H	H	H	B	B	A	A	A	B	B	A	B	H	B	H	H	H	B	B	H	H	A	H	H	B	A	H
BGReSe_15711	H	B	H	H	H	H	A	H	B	H	H	H	H	B	A	H	H	A	B	A	B	H	H	H	H	H	A	H	H	H	H	A	H	A	H	B	H	H	X	B	A	B	B	H	B	H	H	H	B
BGReSe_15662	H	B	B	H	H	H	A	H	H	H	H	H	H	B	A	H	H	A	B	A	B	B	H	H	H	H	H	H	H	H	H	A	H	A	H	B	H	B	A	B	A	B	B	H	B	H	A	H	B
BGReSe_15524	H	A	X	A	H	A	A	A	H	H	B	B	H	B	H	H	A	A	H	A	B	B	H	H	B	H	B	H	B	B	A	H	H	A	A	B	H	B	B	B	B	H	B	H	B	A	A	H	B
BGReSe_15471	H	A	B	A	H	A	A	H	H	H	B	X	H	B	H	H	A	A	H	A	B	B	H	H	B	H	B	H	B	B	A	H	H	A	A	B	H	A	B	B	B	H	B	H	B	A	A	H	B
BGReSe_15197	H	A	B	A	H	A	A	H	H	H	H	B	H	B	H	H	A	A	H	A	B	B	H	H	B	H	B	H	B	B	A	H	H	A	A	B	H	A	B	B	B	H	B	H	B	A	A	H	B
BGReSe_14834	H	A	B	A	H	A	A	H	H	H	H	B	H	B	H	H	A	A	H	A	B	B	H	H	B	H	B	H	B	B	A	H	H	A	A	B	H	A	B	B	B	H	B	H	B	A	A	H	B
BGReSe_15373	H	A	B	A	H	A	A	H	H	H	H	B	H	B	H	H	A	A	H	A	B	B	H	H	B	H	B	H	B	B	A	H	H	A	A	B	H	A	B	B	B	H	B	H	B	A	A	H	B
BGReSe_14708	H	A	B	A	H	A	A	H	H	H	H	B	H	B	H	B	H	A	H	A	B	B	H	H	B	H	B	H	H	H	A	H	H	A	A	B	H	A	B	B	B	H	B	H	B	A	A	H	B
BGReSe_14602	H	H	B	A	H	A	A	H	H	H	H	B	H	B	H	H	A	A	H	H	B	B	H	H	B	H	B	H	H	H	A	H	H	H	A	B	H	A	B	B	B	H	B	H	B	H	A	H	B
BGReSe_14540	H	H	B	A	H	A	A	H	H	B	H	B	H	B	H	H	A	A	H	H	H	B	H	H	B	H	B	B	H	H	A	H	H	H	A	B	H	A	B	A	B	H	B	H	B	H	A	H	B
BGReSe_14520	H	H	B	H	H	A	A	H	H	B	H	B	H	B	H	H	A	A	H	H	H	B	H	H	H	H	B	B	H	H	A	H	H	H	A	B	H	H	B	A	H	H	B	H	B	H	A	H	B
[truncated: 97 more columns]

## Sheet: phenotype
	1	2	3	4	5	6	7	8	9	10	11	12	13	14	15	16	17	18	19	20	21	22	23	24	25	26	27	28	29	30	31	32	33	34	35	36	37	38	39	40	41	42	43	44	45	46	47	48	49
Bitter	0	1	1	1	1	1	1	1	0	0	1	0	1	1	1	1	1	0	1	1	0	0	1	1	1	1	1	1	1	1	0	1	0	0	1	0	1	1	0	0	1	1	0	1	0	1	0	1	1
	1 indicate bitterness
	0 indicate non-bitterness
[truncated: 97 more columns]
